# Supplementary material for: Partial rescue of V1V2 mutant infectivity by HIV-1 cell-cell transmission supports the domain’s exceptional capacity for sequence variation
Source: PubMed Central journal article supplement (PMC4190450; doi:10.1186/s12977-014-0075-y), 2014-09-25
Supplement: 12977_2014_75_MOESM2_ESM.pdf [file 12977_2014_75_MOESM2_ESM.pdf]

## Additional File 2

Derivation of relative infectivities free virus infection and cell-cell transmission

### A

Raw Data (in Relative Light Units, RLU):

|            | free virus infection | cell-cell transmission |
|------------|----------------------|------------------------|
| wt env     | <b><i>a</i></b>      | <b><i>c</i></b>        |
| mutant env | <b><i>b</i></b>      | <b><i>d</i></b>        |

### B

Normalization mutant to wt env infectivity:

Free virus infection:

$$\% \text{ mutant infectivity } (\mathbf{x}) = \frac{b}{a} \times 100$$

Cell-cell transmission:

$$\% \text{ mutant infectivity } (\mathbf{y}) = \frac{d}{c} \times 100$$

### C

Relative cell-cell to free virus infection efficacy of mutant env:

$$\text{Fold difference cell-cell transmission to free virus infectivity} = \frac{y}{x}$$
