# Supplementary material for: Partial rescue of V1V2 mutant infectivity by HIV-1 cell-cell transmission supports the domain’s exceptional capacity for sequence variation
Source: PubMed Central journal article supplement (PMC4190450; doi:10.1186/s12977-014-0075-y), 2014-09-25
Supplement: 12977_2014_75_MOESM3_ESM.pdf [file 12977_2014_75_MOESM3_ESM.pdf]

### Additional File 3

Gaussia luciferase activity of V1V2-deleted and wt envs in free virus infection and cell-cell transmission <sup>a</sup>

| Strain | Type  | free virus infection <sup>b</sup>  | cell-cell transmission <sup>c</sup>            |
|--------|-------|------------------------------------|------------------------------------------------|
|        |       | TZM-bl<br>RLU (Gaussia Luciferase) | 293-T : A3.01-CCR5<br>RLU (Gaussia Luciferase) |
| SF162  | wt    | 430200                             | 45409                                          |
|        | ΔV1V2 | 442100                             | 44325                                          |
| NL4-3  | wt    | 61800                              | 20361                                          |
|        | ΔV1V2 | 14200                              | 1978                                           |
| JR-FL  | wt    | 666000                             | 28620                                          |
|        | ΔV1V2 | 7700                               | 2374                                           |
| RHPA   | wt    | 630900                             | 21816                                          |
|        | ΔV1V2 | 6000                               | 722                                            |
| AC10   | wt    | 282300                             | 15664                                          |
|        | ΔV1V2 | 13300                              | 2998                                           |
| REJO   | wt    | 520300                             | 35187                                          |
|        | ΔV1V2 | 32600                              | 3416                                           |
| ZA110  | wt    | 868200                             | 27427                                          |
|        | ΔV1V2 | 82900                              | 5866                                           |
| CAP88  | wt    | 70600                              | 2167                                           |
|        | ΔV1V2 | 2900                               | 533                                            |
| ZM109  | wt    | 75300                              | 4410                                           |
|        | ΔV1V2 | 1100                               | 524                                            |
| ZM214  | wt    | 40900                              | 23003                                          |
|        | ΔV1V2 | 7800                               | 19185                                          |

<sup>a</sup> Relative light units (RLUs) derived for experiments depicted in Figure 3B. The RLUs shown for free virus infection and cell-cell transmission correspond to 100  $\mu$ l infectious input derived from the same 293-T donor cells.

<sup>b</sup> To determine free virus infectivity virus supernatant from the 293-T donor cells was harvested and titrated on TZM-bl cells to determine Gaussia Luciferase activity per 100  $\mu$ l virus input. Values are means of 3 independent experiments with virus titrations performed in duplicates.

<sup>c</sup> To determine cell-cell transmission 293-T donor cells were harvested and 100  $\mu$ l aliquots (corresponding to 15,000 293-T donor cells) were used for co-culture with 50,000 A3.01-CCR5 cells in 96-wells. Values are means of 3 independent experiments performed with 5 replicates.
