# Supplementary material for: Partial rescue of V1V2 mutant infectivity by HIV-1 cell-cell transmission supports the domain’s exceptional capacity for sequence variation
Source: PubMed Central journal article supplement (PMC4190450; doi:10.1186/s12977-014-0075-y), 2014-09-25

## Additional File 8

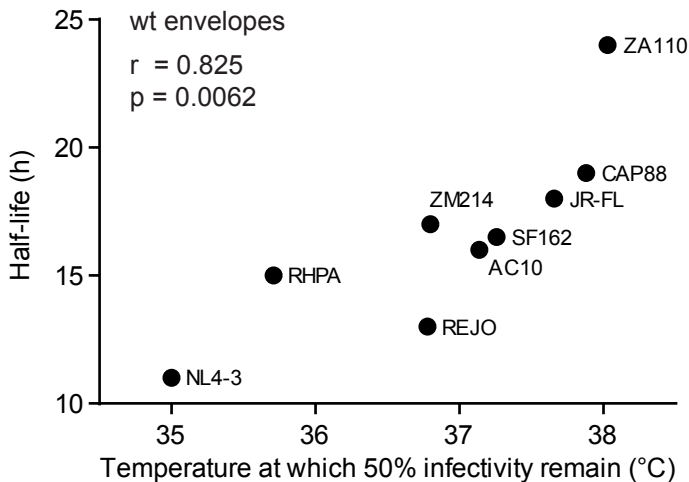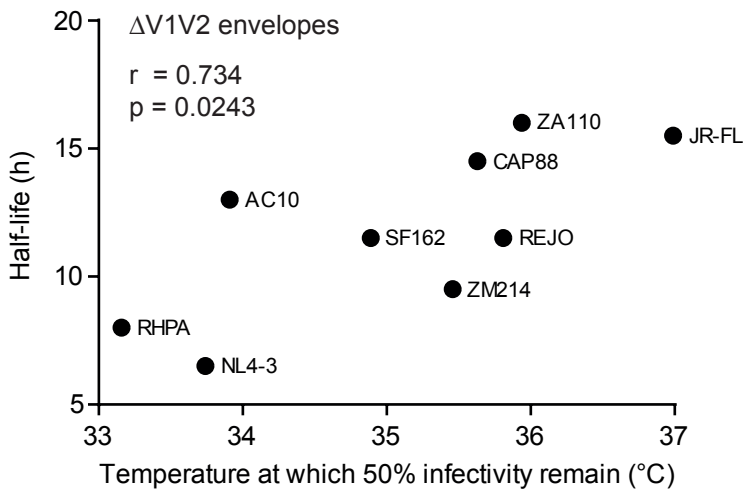

Supplement: 12977_2014_75_MOESM8_ESM.pdf [file 12977_2014_75_MOESM8_ESM.pdf]
