# Supplementary material for: Partial rescue of V1V2 mutant infectivity by HIV-1 cell-cell transmission supports the domain’s exceptional capacity for sequence variation
Source: PubMed Central journal article supplement (PMC4190450; doi:10.1186/s12977-014-0075-y), 2014-09-25
Supplement: 12977_2014_75_MOESM11_ESM.pdf [file 12977_2014_75_MOESM11_ESM.pdf]

# Additional File 11

10 20 30 40 50 60 70 80  
SF162 MRVKGIRKNYQHLWRGGTLLLLGMLMICS AVEKLEWVTVYYGVPVWKEATTTLFCASDAKAYDTEVHNVWATHACVPTDPNP  
P3N .....N. .I.....

90 100 110 120 130 140 150 160  
SF162 QEIVLENVVTENFNMWKNMVEQM HEDIISLWDQSLKPCVKLTPLCVTLHCTNLKNATNTKSSNWKEMDRGEIKNCSEFKVT  
P3N .....G. .D.....R.D. .N. .GE. .M. .N. .

170 180 190 200 210 220 230 240  
SF162 TSIRNKMQEYALFYKLDVVPIDNDNTSYKLIN CNTSVITQACPKVSFEPIPIHYCAPAGFAILK CNDKKFNGSGPCTNV  
P3N .....G. .T. .--. T.....T. .K. .

250 260 270 280 290 300 310 320  
SF162 STVQCTHGIRPVVSTQ LLLNGSLAEEGVVIRSENFTDNAKTIIVQLKESVEINCTRPNNNTRKSITIGPGRAFYATGDII  
P3N .....E. .V.....H. .

330 340 350 360 370 380 390 400  
SF162 GDIRQAHCNISGEKWNNTLQIVTKLQAOFGNKTIVFKQSSGGDPEIVMHSFNCGGEFFYCNSTQLFNSTWNNTIGPNNT  
P3N .....R. .YK. K.....T. .D. .K. .D. .I

410 420 430 440 450 460 470 480  
SF162 NGTITLPCRIKQIINRWQEVGKAMYAPP IIRGQIRCSSNITGLLLTRDGGKEISNTTEIFRPGGDMRDNRSELYKYKVV  
P3N .....I. N. S. P.....

490 500 510 520 530 540 550 560  
SF162 KIEPLGVAPTKAKRRRVQREKRAVTLGAMFLGFLGAAGSTMGAASLTLTVQARQLLSGIVQQNNLLRAIEAQOHLQLT  
P3N .....I.....

570 580 590 600 610 620 630 640  
SF162 VWGIKQLQARVLAVERYLKDQQLLGIWCGSKLICCTAVPWNASWSNKSLDQIWNMTWMEWEREIDNYTNLIYTLIEES  
P3N .....E. .VG. .N.....

650 660 670 680 690 700 710 720  
SF162 QNQQEKNEQELLELDK WASLWNWFDISKWLWYKIFIMIVGGLVGLRIVFTVLSIVNVRVQYSPLSFQTRFPAPRGPDR  
P3N .....S.....

730 740 750 760 770 780 790 800  
SF162 PEGIEEEGGERDRDRSSPLVHGLLALIWDDLRS LCLFSYHRLRDLILIAARIVELLGRRGWEALKYWGNLLQYWIQELKN  
P3N .....V. .R. .T.....

810 820 830 840  
SF162 SAVSLFD AIAIAVAEGTDRIIEVAQRIGRAF LHIPRRIRQGFERALL  
P3N .....N. .G.....
