# Supplementary material for: Partial rescue of V1V2 mutant infectivity by HIV-1 cell-cell transmission supports the domain’s exceptional capacity for sequence variation
Source: PubMed Central journal article supplement (PMC4190450; doi:10.1186/s12977-014-0075-y), 2014-09-25
Supplement: 12977_2014_75_MOESM12_ESM.pdf [file 12977_2014_75_MOESM12_ESM.pdf]

## Additional File 12

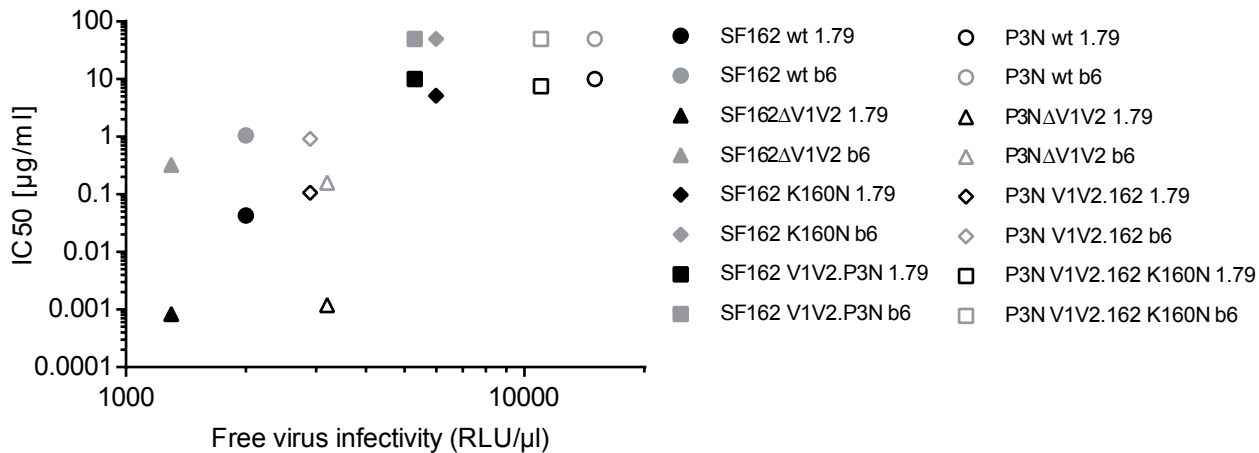

Correlation analysis:

IC50 b6 vs. infectivity:  $r = 0.809$   
 $p = 0.015$

IC50 1.79 vs. infectivity:  $r = 0.775$   
 $p = 0.0238$
