# Supplementary material for: Partial rescue of V1V2 mutant infectivity by HIV-1 cell-cell transmission supports the domain’s exceptional capacity for sequence variation
Source: PubMed Central journal article supplement (PMC4190450; doi:10.1186/s12977-014-0075-y), 2014-09-25

# Additional File 13

Legend:

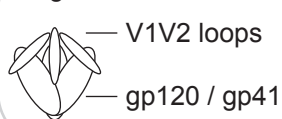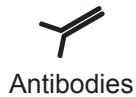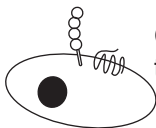

↑ Efficient Target Cell Infection

↓ No Target Cell Infection

**A**

No Neutralizing Abs Present

Free Virus Infection: ↑

Cell-Cell Transmission: ↑

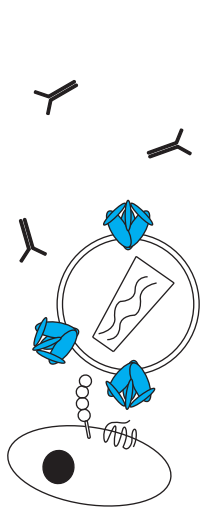

**B**

Neutralizing Ab Response

Free Virus Infection: ↓

Cell-Cell Transmission: ↘

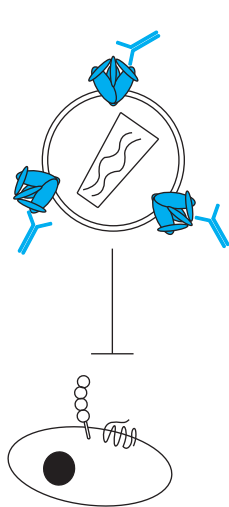

**C**

Neutralization Escape via Mutations in V1V2

Free Virus Infection: ↘

Cell-Cell Transmission: ↗

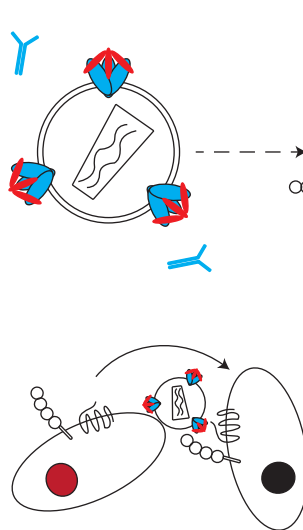

**D**

Evolution of Compensatory Mutations

Free Virus Infection: ↑

Cell-Cell Transmission: ↑

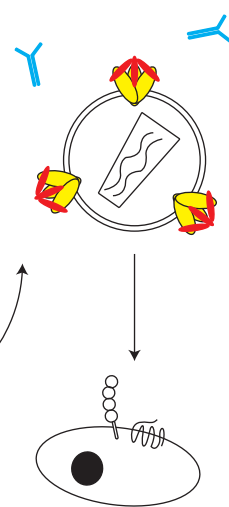

Supplement: 12977_2014_75_MOESM13_ESM.pdf [file 12977_2014_75_MOESM13_ESM.pdf]
